# Supplementary material
Source: Research Square preprint supplement (doi:10.21203/rs.3.rs-9203100/v1)
Supplement: Supplementary file 1 [file 7e9848e605a699dd2afb0494.docx]

Appendix 2 - Functionality of the SD elements

| **Element** | **Function** | **Behaviour** | **Outcome** | **Formula** |
| --- | --- | --- | --- | --- |
| **New Tasks (Flow)** | Represents the inflow of newly emerging project tasks entering the operational system. | Task inflow fluctuates stochastically and increases with cost pressure and uncertainty. | Serves as the primary workload driver of the system. | RANDOM UNIFORM(0,6,1) |
| **Open Tasks (Stock)** | Represents the stock of currently unfinished tasks. | Increases through incoming tasks and rework and decreases through task completion. | Indicates the current workload and influences stress and resource shortages. | INTEG(New Tasks - MIN(Open Tasks,Completion Rate) + Rework Inflow) |
| **Completion Rate (Flow)** | Represents the number of tasks completed per time unit. | Depends on system performance and decreases when backlog increases. | Main operational performance indicator of the system. | MAX(0,0.4*X4 System performance*(1/(1+(Open Tasks/2000)^1.2))) |
| **Completed Tasks (Stock)** | Represents the cumulative number of completed tasks. | Increases continuously with each completed task. | Provides experiential learning input for knowledge development. | INTEG(Completion Rate) |
| **Delayed Completion Rate** | Represents the delayed perception of system productivity. | Completion performance is smoothed over time using a fixed delay. | Drives organisational interpretation of project success. | DELAY FIXED(Completion Rate,4,0) |
| **Rework Inflow (Flow)** | Represents tasks that return to the system due to errors. | A delayed fraction of completed tasks flows back into the backlog. | Creates reinforcing workload loops. | DELAY FIXED(Completion Rate*Error Fraction,6,0) |
| **Knowledge Gain** | Represents knowledge accumulation through completed work. | Knowledge grows with completed tasks but slows due to learning saturation. | Builds the knowledge stock of the project manager. | 0.003 * Completed Tasks * EXP(-0.4 * Knowledge Effectiveness) |
| **Knowledge Loss** | Represents gradual loss of knowledge due to stress and forgetting. | Increases with the knowledge level and stress intensity. | Prevents unrealistic unlimited knowledge growth. | X1 Knowledge of the project manager*0.0005*(1+(X6 Time pressure and stress/(1+X6 Time pressure and stress))) |
| **X1 Knowledge of the Project Manager (Stock)** | Represents accumulated managerial project knowledge. | Increases through learning and decreases through knowledge loss. | Influences decisions, communication and systems thinking. | INTEG(Knowledge Gain - Knowledge Loss) |
| **Knowledge Effectiveness** | Represents the delayed effectiveness of accumulated knowledge. | Knowledge influence becomes effective gradually and is affected by resource shortages. | Moderates knowledge gain dynamics. | DELAY3(X1 Knowledge of the project manager,50) |
| **X1 Delay** | Represents the delayed operationalisation of knowledge. | Knowledge is translated into actionable capability with a delay. | Influences decision quality. | DELAY3(X1 Knowledge of the project manager,8) |
| **Open Tasks Perception** | Represents perceived workload rather than actual workload. | Smooths the backlog over time. | Drives stress and resource shortage more realistically. | SMOOTH(Open Tasks,6) |
| **X6 Time Pressure and Stress** | Represents perceived time pressure in the project. | Increases logarithmically with perceived workload. | Negatively affects decisions, communication and social dynamics. | MIN(10,LOG(1+Open Tasks perception,2.718)) |
| **Decision Pressure** | Represents additional decision pressure from external factors. | Fluctuates randomly over time. | Increases misunderstandings and decision errors. | RANDOM UNIFORM(0,5,1) |
| **X5 Misunderstandings & Misjudgements** | Represents communication failures and incorrect interpretations. | Increases with stress and decision pressure. | Reduces decision quality. | 0.3*X6 Time pressure and stress + 0.1*Decision pressure |
| **X8 Virtual Meetings** | Represents the proportion of communication taking place virtually. | Increases with stress and workload. | Weakens social soft factors and communication quality. | MIN(1,0.8*LOG(1+X6 Time pressure and stress,2)) |
| **X9 Social Soft Factors** | Represents social cohesion and trust within the team. | Improves with knowledge and systems thinking but declines with virtual meetings. | Influences team motivation. | MIN(10,MAX(0,0.4*X1 Knowledge -0.4*X6 Time pressure and stress -0.2*X8 Virtual meetings +0.5*X11 Systems Thinking)) |
| **X2 Decisions** | Represents managerial decision quality and quantity. | Improves with knowledge and decreases with stress and misunderstandings. | Influences communication and overall performance. | MIN(10,MAX(1,0.5 +0.3*X1 Delay -0.4*X5 Misunderstandings & misjudgements -0.4*X6 Time pressure and stress)) |
| **X3 Communication** | Represents the quality of communication within the team. | Improves with decisions and systems thinking but worsens with virtual meetings. | Directly contributes to system performance. | MIN(10,MAX(0,0.5*X2 Decisions +0.5*New Tasks -0.2*X8 Virtual meetings +0.3*X11 Systems Thinking)) |
| **X7 Team Motivation** | Represents the motivation level of the project team. | Improves with social factors and organisational acceptance but decreases with cost pressure. | Contributes to system performance. | MIN(10,MAX(0,0.5*X9 Social soft factors +0.4*X12 Acceptance in the Organisation +0.2*X11 Systems Thinking + RANDOM UNIFORM(-4,4,1))) |
| **X4 System Performance** | Represents aggregated project productivity. | Emerges from decisions, communication and motivation but decreases under resource shortages. | Determines the completion rate of tasks. | MIN(10,MAX(0,0.5*X2 Decisions +0.5*X3 Communication +0.5*X7 Team Motivation -0.8*Ressource shortage)) |
| **Error Fraction** | Represents the proportion of completed tasks that contain errors. | Increases with stress and decreases with systems thinking. | Determines rework inflow. | MIN(0.4,MAX(0,0.15 +0.02*X6 Time pressure and stress -0.03*X11 Systems Thinking)) |
| **Cost Pressure & Uncertainty** | Represents external cost pressure in the project environment. | Fluctuates randomly. | Increases workload and reduces team motivation. | RANDOM UNIFORM(0,5,1) |
| **Resource Shortage *(Base ressource usage)*** | Represents perceived lack of available project resources. | Increases with workload pressure. | Reduces system performance and knowledge effectiveness. | MIN(1,MAX(0,0.15 +0.65*Open Tasks perception/(Open Tasks perception+600) +0.05*RANDOM UNIFORM(-1,1,1))) |
| **Resource Shortage *(High ressource usage)*** | Represents perceived lack of available project resources. | Increases with workload pressure. | Reduces system performance and knowledge effectiveness. | MIN(3, MAX(0, 0.15+0.65*Open Tasks perception/(Open Tasks perception+600)+0.2*X11 Systems Thinking + 0.05*RANDOM UNIFORM(-1,1,1))) |
| **Efficiency Index** | Represents the relation between output and incoming workload. | Increases when completion keeps pace with task inflow. | Used as a KPI for scenario comparison. | Completion Rate/(New Tasks+0.0001) |
| **Scenario Adaptation** | Represents the implementation intensity of systemic methods. | Fixed scenario parameter. | Controls the growth of systems thinking. | Low = 0.01 Medium = 0.04 High = 0.08 |
| **X11 Activation Threshold** | Represents the knowledge threshold required before systems thinking emerges. | Increases non-linearly with knowledge. | Activates systems thinking growth. | 3 |
| **X11 Growing (Flow)** | Represents the growth of systems thinking capabilities. | Growth occurs once knowledge exceeds the threshold. | Builds the systems thinking stock. | MAX(0,MIN(1,IF THEN ELSE(X1 Knowledge > X11 Activation threshold,Scenario Adaptation*X12 Acceptance in the Organisation*(10-X11 Systems Thinking)-0.05*Ressource shortage,0))) |
| **X11 Erosion (Flow)** | Represents the erosion of systems thinking capabilities. | Increases with stress and existing systems thinking level. | Prevents unlimited growth of systems thinking. | MAX(0,X11 Systems Thinking*(0.003+0.0012*X6 Time pressure and stress)) |
| **X11 Systems Thinking (Stock)** | Represents the degree of systemic thinking applied in project management. | Builds through growth and declines through erosion. | Improves communication, social factors and error reduction. | INTEG(X11 Growing - X11 Erosion) |
| **Completion Rate Lookup** | Represents the interpretation of completion performance by the organisation. | Converts performance into acceptance using a lookup table. | Drives organisational acceptance. | LOOKUP(Delayed completion Rate) |
| **X12 Acceptance in the Organisation** | Represents organisational openness toward systemic methods. | Increases with interpreted system performance. | Enables systems thinking growth and improves motivation. | Completion Rate Lookup |

Functions of Model Elements. Source: Own research. Tool: Vensim PLE10.2.2
