# Supplementary material
Source: Research Square preprint supplement (doi:10.21203/rs.3.rs-9203100/v1)
Supplement: Supplementary file 2 [file cf2554f53342e1a863f02855.docx]

Appendix 1 - Key Statements of the Focus Groups

| **Overview of key statements from focus groups & Selected Categories** | |
| --- | --- |
| **Statements A: Reasons for missed targets in project management** | |
| A1 | Project managers know too little about the structure and therefore do not understand the system behaviour. |
| A2 | Decisions are made incorrectly due to a lack of knowledge and the system does not deliver the desired results. |
| A3 | Deficits in experience, knowledge, communication and understanding are the causes of incorrect judgements and decisions. |
| A4 | That system behaviour is not taken into account due to a lack of systemic thinking. |
| A5 | Misunderstandings in communication due to incomplete information. |
| A6 | Misjudgement of risks and problems due to wrong decisions. |
| A7 | Time pressure and stress. |
| A8 | Deficiencies in team motivation. |
| A9 | Deficits in resource management. |
| A10 | Many participants do not actively participate in virtual meetings. |
| A11 | Too many virtual meetings reduce social bonding. |
| A12 | Social factors are neglected due to the daily time pressure and enormous complexity. |
| A13 | Project management methods are not carefully applied. |
| **Statements B: Effects of social factors in the organisation** | |
| B1 | Insufficient consideration of social factors reduces the motivation of the team. |
| B2 | Focusing only on hard factors could lead to dissatisfaction among stakeholders. |
| B3 | Digital meetings lead to deficits in social bonding and relationships. |
| B4 | Project managers often have major problems with their projects because they lack soft skills. |
| B5 | The higher the level of experience, the more social factors are considered in everyday life. |
| B6 | The project manager should create a familiar atmosphere to improve motivation in the team. |
| B7 | Project managers must be able to adapt and make decisions to deal with team conflicts. |
| **Statements C: Important success criteria in project management** | |
| C1 | Soft facts must be implemented in the daily task routine. |
| C2 | A learning organisation must be created. |
| C3 | You need a conflict resolution process to find constructive solutions. |
| C4 | Fewer virtual meetings for better output. |
| C5 | You have to learn from your mistakes to achieve dynamic goals. |
| C6 | To achieve project goals, it is important to create a clear structure, set priorities and divide tasks into small subtasks as in systemic thinking |
| C7 | Clear understanding within the team about the delegation of tasks and responsibilities. |
| C8 | Making the function of the system clear to the project manager can improve decisions and lead to positive feedback. |
| **Statements D: Effects and interactions of systemic methods and systemic thinking** | |
| D1 | Project managers who understand the system can make better decisions and achieve positive feedback from the entire team. |
| D2 | Enable better handling of change and complexity. |
| D3 | Promoting co-operation, empathy, interpersonal relationships and support within the project team. |
| D4 | Keep the team's emotions under control. |
| D5 | Better understanding of the team's opinions and feelings. |
| D6 | Improve communication and increase team interaction. |
| D7 | Better control, management and diagnosis of projects. |
| **Statements E: Framework conditions for the use of systemic concepts in the organisation** | |
| E1 | Top management and executives must be convinced of the concepts to act as a driving force for the entire organisation. |
| E2 | Encourage the organisation to change step by step through good and small results. |
| E3 | Project management can serve as a model for applying these concepts. |
| E4 | To accept new concepts, measurable variables must be proven. |
| E5 | Prevent barriers through good involvement and clear information. |

Key Statements and the selected categories. Source: (Schneider & Papula, 2026)
